# Supplementary material for: Characterization of Cefiderocol Heteroresistance in Carbapenem-Resistant Acinetobacter Baumannii (CRAB) Following Exposure to Human Pleural Fluid (HPF)
Source: Preprints.org preprint supplement (doi:10.20944/preprints202306.0950.v1), 2023-06-13

AMA40  
CAMHA

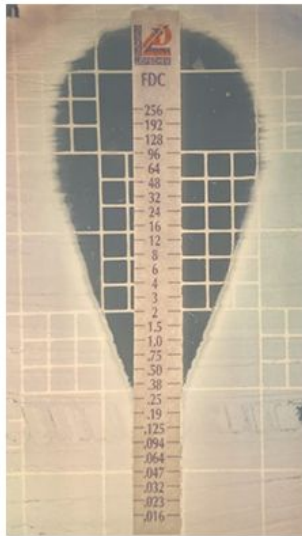

AMA40  
CAMHA  
+AVI(4ug/ml)

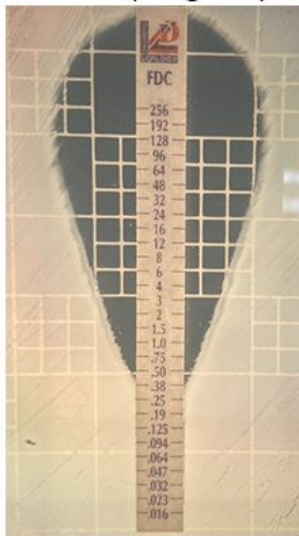

AMA40  
CAMHA  
+REL(4ug/ml)

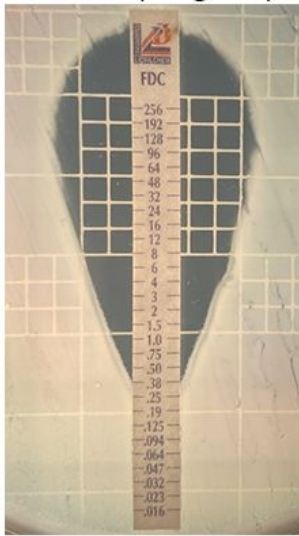

AMA40  
CAMHA  
+ZID(4ug/ml)

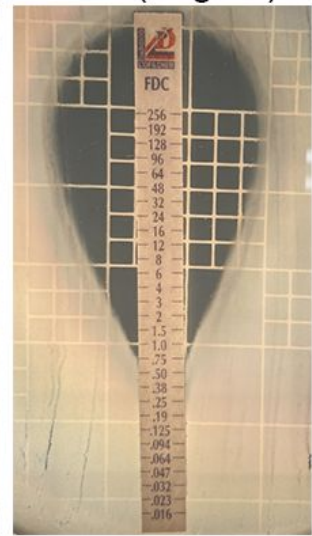

AMA40 IHC1  
CAMHA

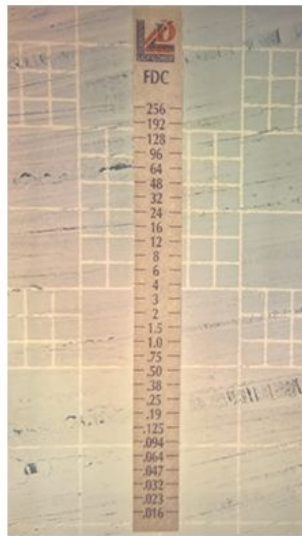

AMA40 IHC1  
CAMHA  
+AVI(4ug/ml)

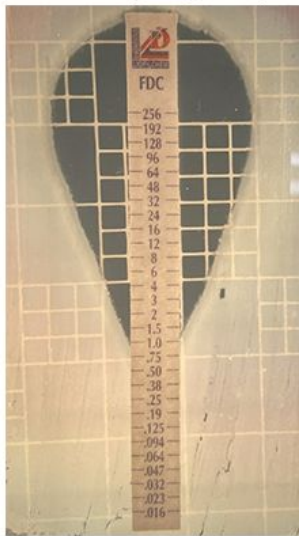

AMA40 IHC1  
CAMHA  
+REL(4ug/ml)

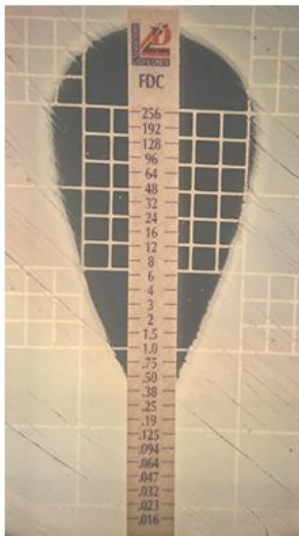

AMA40 IHC1  
CAMHA  
+ZID(4ug/ml)

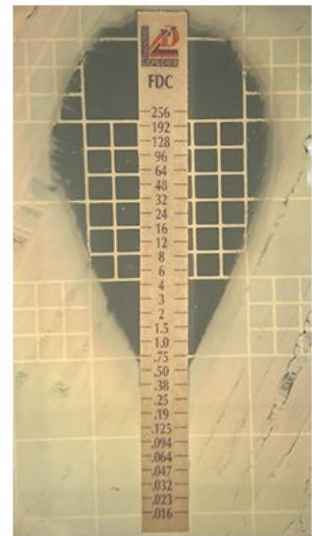

AMA40 IHC2  
CAMHA

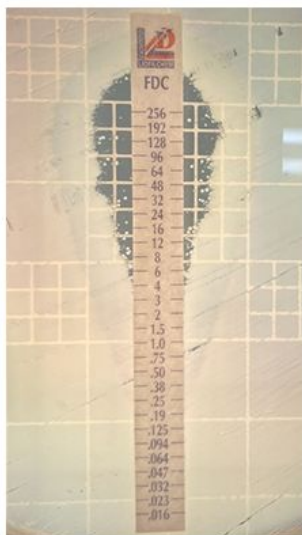

AMA40 IHC2  
CAMHA  
+AVI(4ug/ml)

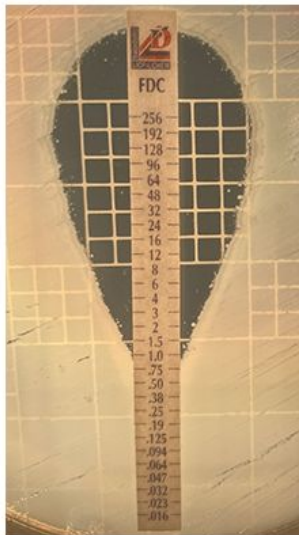

AMA40 IHC2  
CAMHA  
+REL(4ug/ml)

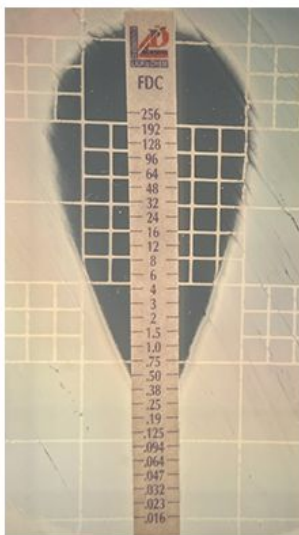

AMA40 IHC2  
CAMHA  
+ZID(4ug/ml)

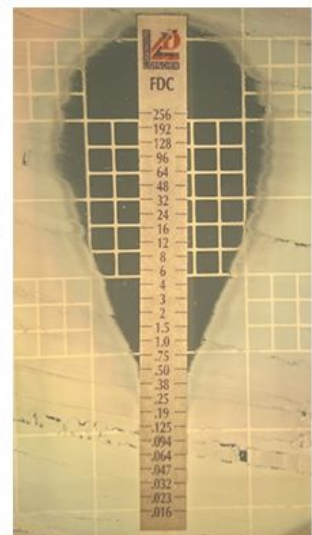

Supplement: Supplementary file 1 [file supplementary]
