# Supplementary material for: Characterization of Cefiderocol Heteroresistance in Carbapenem-Resistant Acinetobacter Baumannii (CRAB) Following Exposure to Human Pleural Fluid (HPF)
Source: Preprints.org preprint supplement (doi:10.20944/preprints202306.0950.v1), 2023-06-13
Supplement: Supplementary file 1 [file supplementary]

## Sheet: Total_Mutation
Predicted mutations
position	mutation	IHC1	IHC2	annotation	gene	description
5,464	C→T	1	1	D68D (GAC→GAT)	parE →	DNA topoisomerase 4 subunit B
251,660	+T	0	1	coding (60/459 nt)	AMA40_00241 →	hypothetical protein
271,039	Δ100 bp	1	1	intergenic (+106/‑1)	panZ → / → AMA40_00266	PanD regulatory factor/tRNA‑Phe(gaa)
516,537	+T	0	1	coding (841/843 nt)	dgcN ←	Diguanylate cyclase DgcN
522,817	A→G	1	1	V215V (GTA→GTG)	aidA_1 →	Quorum‑quenching protein AidA
655,523	95 bp→25 bp	1	1		[AMA40_00650]	[AMA40_00650] tRNA‑Val(tac)
746,840	Δ261 bp	1	1	intergenic (‑137/+48)	lipB ← / ← AMA40_00733	Octanoyltransferase/hypothetical protein
772,462	A→G	1	1	P193P (CCA→CCG)	AMA40_00754 →	hypothetical protein
773,324	A→G	1	0	intergenic (+775/‑546)	AMA40_00754 → / → AMA40_00755	hypothetical protein/hypothetical protein
773,326	2 bp→GT	1	0	intergenic (+777/‑543)	AMA40_00754 → / → AMA40_00755	hypothetical protein/hypothetical protein
773,330	C→T	1	0	intergenic (+781/‑540)	AMA40_00754 → / → AMA40_00755	hypothetical protein/hypothetical protein
773,369	A→G	1	1	intergenic (+820/‑501)	AMA40_00754 → / → AMA40_00755	hypothetical protein/hypothetical protein
802,276	C→A	1	1	intergenic (‑62/‑325)	kgtP_1 ← / → glpK	Alpha‑ketoglutarate permease/Glycerol kinase
989,974	T→G	0	1	T40P (ACA→CCA)	AMA40_00955 ←	hypothetical protein
995,415	T→A	1	1	F1117I (TTT→ATT)	cas3 →	CRISPR‑associated nuclease/helicase Cas3 subtype I‑F/YPEST
1,045,384	C→A	1	1	T536N (ACT→AAT)	AMA40_01000 →	hypothetical protein
1,164,177	+A	1	1	intergenic (‑103/‑147)	AMA40_01102 ← / → AMA40_01103	hypothetical protein/hypothetical protein
1,240,005	Δ100 bp	1	1		[AMA40_01177]	[AMA40_01177] tRNA‑Leu(tag)
1,266,772	A→G	1	1	S82G (AGC→GGC)	AMA40_01191 →	hypothetical protein
1,367,847	T→C	1	1	H174H (CAT→CAC)	AMA40_01293 →	putative protein
1,497,141	C→T	1	1	S56S (TCG→TCA)	yheS_1 ←	putative ABC transporter ATP‑binding protein YheS
1,520,636	Δ100 bp	0	1	intergenic (+1337/‑120)	AMA40_01420 → / → AMA40_01421	hypothetical protein/hypothetical protein
1,520,736	99 bp→35 bp	0	1	intergenic (+1437/‑21)	AMA40_01420 → / → AMA40_01421	hypothetical protein/hypothetical protein
1,671,800	Δ149 bp	1	1	intergenic (+939/‑277)	AMA40_01603 → / → AMA40_01604	hypothetical protein/Extracellular serine proteinase
1,692,985	T→C	1	1	K284K (AAA→AAG)	AMA40_01627 ←	hypothetical protein
1,778,249	Δ260 bp	1	1		[AMA40_01705]–[AMA40_01706]	[AMA40_01705], [AMA40_01706]
1,843,534	G→A	1	1	G77D (GGT→GAT)	quiA →	Quinate/shikimate dehydrogenase (quinone)
1,906,131	A→G	1	1	A76A (GCT→GCC)	AMA40_01830 ←	hypothetical protein
1,908,246	(A)7→8	1	1	intergenic (+64/‑135)	ohrR_1 → / → namA_2	Organic hydroperoxide resistance transcriptional regulator/NADPH dehydrogenase
2,383,653	G→A	1	1	K32K (AAG→AAA)	soxC_3 →	Dibenzothiophene desulfurization enzyme C
2,490,042	Δ100 bp	1	1	intergenic (‑44/‑1001)	AMA40_02406 ← / → AMA40_02407	hypothetical protein/hypothetical protein
2,497,136	Δ155 bp	1	1	intergenic (+102/‑184)	cinA_1 → / → AMA40_02412	Putative competence‑damage inducible protein/hypothetical protein
2,647,701	Δ100 bp	1	1	intergenic (+332/‑348)	AMA40_02546 → / → higB‑2	IS5 family transposase IS17/Toxin HigB‑2
2,727,646	A→C	0	1	H562Q (CAT→CAG)	AMA40_02627 ←	hypothetical protein
2,857,297	T→A	0	1	T239S (ACT→TCT)	AMA40_02739 ←	hypothetical protein
2,922,816	A→T	1	1	intergenic (+1/‑150)	AMA40_02792 → / → AMA40_02793	Ferredoxin 1/hypothetical protein
2,932,896	C→T	1	1	V118I (GTT→ATT)	lptA ←	Lipopolysaccharide export system protein LptA
3,055,697	G→A	1	1	intergenic (‑38/‑232)	epd ← / → alaS	D‑erythrose‑4‑phosphate dehydrogenase/Alanine‑‑tRNA ligase
3,373,227	99 bp→6 bp	1	0	intergenic (+77/+322)	add → / ← AMA40_03238	Adenosine deaminase/tRNA‑Pro(tgg)
3,373,227	99 bp→13 bp	0	1	intergenic (+77/+322)	add → / ← AMA40_03238	Adenosine deaminase/tRNA‑Pro(tgg)
3,373,548	Δ100 bp	1	1		[AMA40_03238]	[AMA40_03238] tRNA‑Pro(tgg)
3,393,078	Δ100 bp	1	0	intergenic (‑190/+306)	AMA40_03261 ← / ← AMA40_03262	hypothetical protein/hypothetical protein
3,393,078	97 bp→24 bp	0	1	intergenic (‑190/+309)	AMA40_03261 ← / ← AMA40_03262	hypothetical protein/hypothetical protein
3,622,933	Δ155 bp	1	1		[AMA40_03475]	[AMA40_03475] hypothetical protein
3,642,362	C→T	1	1	L38L (CTG→CTA)	AMA40_03493 ←	hypothetical protein
3,750,217	Δ100 bp	1	1		[AMA40_03589]	[AMA40_03589] tRNA‑Met(cat)
3,853,701	C→T	1	1	S47N (AGT→AAT)	lptG ←	Lipopolysaccharide export system permease protein LptG
4,011,111	C→T	1	1	R16H (CGC→CAC)	lldD ←	L‑lactate dehydrogenase
4,013,837	T→A	1	1	intergenic (‑250/‑130)	lldP ← / → algC_2	L‑lactate permease/Phosphomannomutase/phosphoglucomutase
4,115,711	C→A	1	1	H312N (CAT→AAT)	tyrS →	Tyrosine‑‑tRNA ligase
4,116,244	97 bp→42 bp	1	1	intergenic (+252/+662)	tyrS → / ← ppiA	Tyrosine‑‑tRNA ligase/Peptidyl‑prolyl cis‑trans isomerase A
4,117,091	A→C	1	1	S157A (TCT→GCT)	ppiA ←	Peptidyl‑prolyl cis‑trans isomerase A
4,146,762	Δ62 bp	1	1	intergenic (‑79/+145)	aacA‑aphD ← / ← AMA40_03980	Bifunctional AAC/APH/IS6 family transposase IS1006

## Sheet: shared_mutation
Predicted mutations
position	mutation	IHC1	IHC2	annotation	gene	description
5.464	C→T	1	1	D68D (GAC→GAT)	parE →	DNA topoisomerase 4 subunit B
271.039	Δ100 bp	1	1	intergenic (+106/‑1)	panZ → / → AMA40_00266	PanD regulatory factor/tRNA‑Phe(gaa)
522.817	A→G	1	1	V215V (GTA→GTG)	aidA_1 →	Quorum‑quenching protein AidA
655.523	95 bp→25 bp	1	1		[AMA40_00650]	[AMA40_00650]
746,840	Δ261 bp	1	1	intergenic (‑137/+48)	lipB ← / ← AMA40_00733	Octanoyltransferase/hypothetical protein
772.462	A→G	1	1	P193P (CCA→CCG)	AMA40_00754 →	hypothetical protein
773.369	A→G	1	1	intergenic (+820/‑501)	AMA40_00754 → / → AMA40_00755	hypothetical protein/hypothetical protein
802.276	C→A	1	1	intergenic (‑62/‑325)	kgtP_1 ← / → glpK	Alpha‑ketoglutarate permease/Glycerol kinase
995.415	T→A	1	1	F1117I (TTT→ATT)	cas3 →	CRISPR‑associated nuclease/helicase Cas3 subtype I‑F/YPEST
1,045,384	C→A	1	1	T536N (ACT→AAT)	AMA40_01000 →	hypothetical protein
1,164,177	+A	1	1	intergenic (‑103/‑147)	AMA40_01102 ← / → AMA40_01103	hypothetical protein/hypothetical protein
1,240,005	Δ100 bp	1	1		[AMA40_01177]	[AMA40_01177]
1,266,772	A→G	1	1	S82G (AGC→GGC)	AMA40_01191 →	hypothetical protein
1,367,847	T→C	1	1	H174H (CAT→CAC)	AMA40_01293 →	putative protein
1,497,141	C→T	1	1	S56S (TCG→TCA)	yheS_1 ←	putative ABC transporter ATP‑binding protein YheS
1,671,800	Δ149 bp	1	1	intergenic (+939/‑277)	AMA40_01603 → / → AMA40_01604	hypothetical protein/Extracellular serine proteinase
1,692,985	T→C	1	1	K284K (AAA→AAG)	AMA40_01627 ←	hypothetical protein
1,778,249	Δ260 bp	1	1		[AMA40_01705]–[AMA40_01706]	[AMA40_01705], [AMA40_01706]
1,843,534	G→A	1	1	G77D (GGT→GAT)	quiA →	Quinate/shikimate dehydrogenase (quinone)
1,906,131	A→G	1	1	A76A (GCT→GCC)	AMA40_01830 ←	hypothetical protein
1,908,246	(A)7→8	1	1	intergenic (+64/‑135)	ohrR_1 → / → namA_2	Organic hydroperoxide resistance transcriptional regulator/NADPH dehydrogenase
2,383,653	G→A	1	1	K32K (AAG→AAA)	soxC_3 →	Dibenzothiophene desulfurization enzyme C
2,490,042	Δ100 bp	1	1	intergenic (‑44/‑1001)	AMA40_02406 ← / → AMA40_02407	hypothetical protein/hypothetical protein
2,497,136	Δ155 bp	1	1	intergenic (+102/‑184)	cinA_1 → / → AMA40_02412	Putative competence‑damage inducible protein/hypothetical protein
2,647,701	Δ100 bp	1	1	intergenic (+332/‑348)	AMA40_02546 → / → higB‑2	IS5 family transposase IS17/Toxin HigB‑2
2,922,816	A→T	1	1	intergenic (+1/‑150)	AMA40_02792 → / → AMA40_02793	Ferredoxin 1/hypothetical protein
2,932,896	C→T	1	1	V118I (GTT→ATT)	lptA ←	Lipopolysaccharide export system protein LptA
3,055,697	G→A	1	1	intergenic (‑38/‑232)	epd ← / → alaS	D‑erythrose‑4‑phosphate dehydrogenase/Alanine‑‑tRNA ligase
3,373,548	Δ100 bp	1	1		[AMA40_03238]	[AMA40_03238]
3,622,933	Δ155 bp	1	1		[AMA40_03475]	[AMA40_03475]
3,642,362	C→T	1	1	L38L (CTG→CTA)	AMA40_03493 ←	hypothetical protein
3,750,217	Δ100 bp	1	1		[AMA40_03589]	[AMA40_03589]
3,853,701	C→T	1	1	S47N (AGT→AAT)	lptG ←	Lipopolysaccharide export system permease protein LptG
4,011,111	C→T	1	1	R16H (CGC→CAC)	lldD ←	L‑lactate dehydrogenase
4,013,837	T→A	1	1	intergenic (‑250/‑130)	lldP ← / → algC_2	L‑lactate permease/Phosphomannomutase/phosphoglucomutase
4,115,711	C→A	1	1	H312N (CAT→AAT)	tyrS →	Tyrosine‑‑tRNA ligase
4,116,244	97 bp→42 bp	1	1	intergenic (+252/+662)	tyrS → / ← ppiA	Tyrosine‑‑tRNA ligase/Peptidyl‑prolyl cis‑trans isomerase A
4,117,091	A→C	1	1	S157A (TCT→GCT)	ppiA ←	Peptidyl‑prolyl cis‑trans isomerase A
4,146,762	Δ62 bp	1	1	intergenic (‑79/+145)	aacA‑aphD ← / ← AMA40_03980	Bifunctional AAC/APH/IS6 family transposase IS1006

## Sheet: only_IHC1
Predicted mutations
position	mutation	IHC1	IHC2	annotation	gene	description
773.324	A→G	1	0	intergenic (+775/‑546)	AMA40_00754 → / → AMA40_00755	hypothetical protein/hypothetical protein
773.326	2 bp→GT	1	0	intergenic (+777/‑543)	AMA40_00754 → / → AMA40_00755	hypothetical protein/hypothetical protein
773,330	C→T	1	0	intergenic (+781/‑540)	AMA40_00754 → / → AMA40_00755	hypothetical protein/hypothetical protein
3,373,227	99 bp→6 bp	1	0	intergenic (+77/+322)	add → / ← AMA40_03238	Adenosine deaminase/tRNA‑Pro(tgg)
3,393,078	Δ100 bp	1	0	intergenic (‑190/+306)	AMA40_03261 ← / ← AMA40_03262	hypothetical protein/hypothetical protein

## Sheet: only_IHC2
Predicted mutations
position	mutation	IHC1	IHC2	annotation	gene	description
251.66	+T	0	1	coding (60/459 nt)	AMA40_00241 →	hypothetical protein
516.537	+T	0	1	coding (841/843 nt)	dgcN ←	Diguanylate cyclase DgcN
989.974	T→G	0	1	T40P (ACA→CCA)	AMA40_00955 ←	hypothetical protein
1,520,636	Δ100 bp	0	1	intergenic (+1337/‑120)	AMA40_01420 → / → AMA40_01421	hypothetical protein/hypothetical protein
1,520,736	99 bp→35 bp	0	1	intergenic (+1437/‑21)	AMA40_01420 → / → AMA40_01421	hypothetical protein/hypothetical protein
2,727,646	A→C	0	1	H562Q (CAT→CAG)	AMA40_02627 ←	hypothetical protein
2,857,297	T→A	0	1	T239S (ACT→TCT)	AMA40_02739 ←	hypothetical protein
3,373,227	99 bp→13 bp	0	1	intergenic (+77/+322)	add → / ← AMA40_03238	Adenosine deaminase/tRNA‑Pro(tgg)
3,393,078	97 bp→24 bp	0	1	intergenic (‑190/+309)	AMA40_03261 ← / ← AMA40_03262	hypothetical protein/hypothetical protein
