# Supplementary material for: Characterization of Cefiderocol Heteroresistance in Carbapenem-Resistant Acinetobacter Baumannii (CRAB) Following Exposure to Human Pleural Fluid (HPF)
Source: Preprints.org preprint supplement (doi:10.20944/preprints202306.0950.v1), 2023-06-13
Supplement: Supplementary file 3 [file Table S2.docx]

Table S2. Minimal Inhibitory Concentrations of cefiderocol (CFDC) performed using cefiderocol MTS strips (Liofilchem S.r.l., Italy) on cation-adjusted Mueller Hinton Agar (CAMHA) alone or supplemented with the different DBOs.

| Strain | Condition | | | |
| --- | --- | --- | --- | --- |
|  | CAMHA | CAMHA+AVI (4ug/ml) | CAMHA+REL (4ug/ml) | CAMHA+ZID (4ug/ml) |
| AMA40 | 0.38 | 0.50 | 0.38 | 0.75 |
| AMA40 IHC1 | >256 | 1.00 | 0.50 | 0.75 |
| AMA40 IHC2 | 8 | 1.00 | 0.50 | 0.75 |

AVI: avibactam, REL: relebactam, ZID: zidebactam
