# Supplementary material for: Characterization of Cefiderocol Heteroresistance in Carbapenem-Resistant Acinetobacter Baumannii (CRAB) Following Exposure to Human Pleural Fluid (HPF)
Source: Preprints.org preprint supplement (doi:10.20944/preprints202306.0950.v1), 2023-06-13
Supplement: Supplementary file 4 [file Table S3.docx]

Table S3. Minimal Inhibitory Concentrations of cefiderocol (CFDC) performed using cefiderocol MTS strips (Liofilchem S.r.l., Italy) on cation-adjusted Mueller Hinton Agar (CAMHA) alone or supplemented with 300 *m*g/L ZnSO4.

| CFDC MICs (*m*g/L) | | |
| --- | --- | --- |
| Strain | CAMHA | CAMHA+ 300 *m*g/L ZnSO4 |
| AMA40 | 0.38 | 2 |
| AMA40 IHC1 | >256 | >256 |
| AMA40 IHC2 | 8 | 8 |
