# Supplementary material for: Characterization of Cefiderocol Heteroresistance in Carbapenem-Resistant Acinetobacter Baumannii (CRAB) Following Exposure to Human Pleural Fluid (HPF)
Source: Preprints.org preprint supplement (doi:10.20944/preprints202306.0950.v1), 2023-06-13

**A)**

AMA40  
CFDC

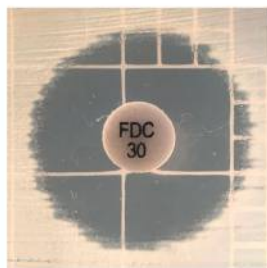

AMA40  
CFDC  
+EDTA(0.5mmol/L)

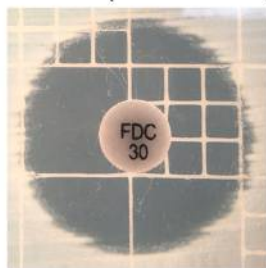

AMA40 IHC1  
CFDC

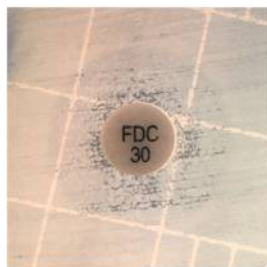

AMA40 IHC1  
CFDC  
+EDTA(0.5mmol/L)

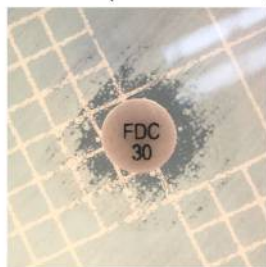

**B)**

AMA40  
CFDC

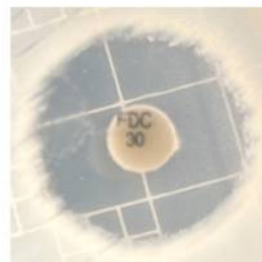

AMA40  
CFDC  
+Boronic Acid

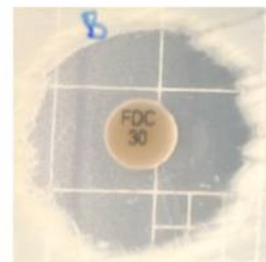

AMA40 IHC1  
CFDC

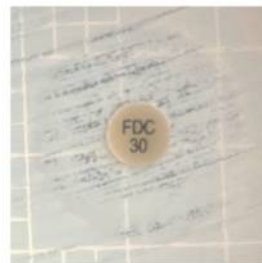

AMA40 IHC1  
CFDC  
+Boronic Acid

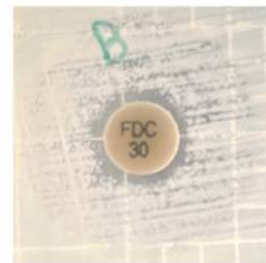

AMA40 IHC2  
CFDC

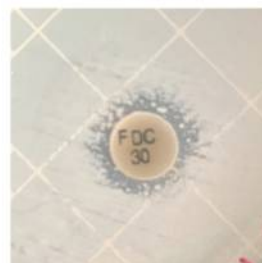

AMA40 IHC2  
CFDC  
+Boronic Acid

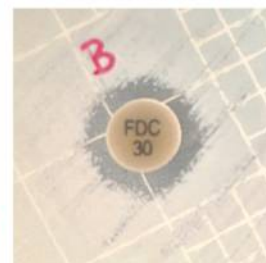

Supplement: Supplementary file 5 [file supplementary]
