# Supplementary material for: Characterization of Cefiderocol Heteroresistance in Carbapenem-Resistant Acinetobacter Baumannii (CRAB) Following Exposure to Human Pleural Fluid (HPF)
Source: Preprints.org preprint supplement (doi:10.20944/preprints202306.0950.v1), 2023-06-13
Supplement: Supplementary file 5 [file Table S4.docx]

| qRT-PCR Primer Table for AMA40, IHC1, and IHC2 | | |
| --- | --- | --- |
| Primer Name | Relation | 5’-3’ Sequence |
| *blaADC*F *(ampC)* | β-lactamase | TGCCAACCTTAACCCACA |
| *blaADC*R *(ampC)* | β-lactamase | AGTTTGTAACGTTGCCGG |
| *bla*NDM-1 F | β-lactamase | GAAGCTGAGCACCGCATTAG |
| *bla*NDM-1 R | β-lactamase | AACCAGATCGCCAAACCGTT |
| *bla*ompA F | β-lactamase | TCTTGGTGGTCACTTGAAGC |
| *bla*ompA R | β-lactamase | ACTCTTGGCTTGTGGAGCA |
| *bla*carO F | Resistance | GGCGGATGAAGCTGTTGTTC |
| *bla*carO R | Resistance | GCCATAACAAAGCACCACCG |
| *bauA* F | Iron uptake | AAATGTTTGGCCGCGTTGAGGT |
| *bauA* R | Iron uptake | CAATCGTGCAAACGGTTCATCAGC |
| *bfmR* F | Biofilm | CGATGGTAACCGTGCAATTCGT |
| *bfmR* R | Biofilm | ATCGTCTGCACCCATTTCCAGA |
| *bfnH* F | Iron uptake | ACTGCGACTCGTACACCAAA |
| *bfnH* R | Iron uptake | ACTTTACGACCTGCCGTAGC |
| *csuAB* F | Biofilm | CAGGCTGTACTGTAGGTG |
| *csuAB* R | Biofilm | CAGGATCTGTTCCGTCAC |
| *csuB* F | Biofilm | GCAAAGGTTCTTGGAATATCCGT |
| *csuB* R | Biofilm | TGGACGAACCATTCTTCATACGT |
| *csuE* F | Biofilm | TGGACAAAGTGTATCGCCGG |
| *csuE* R | Biofilm | ACACCCCGATTCCCACAATC |
| *exbD* F | Iron uptake | GCAGGTCAAGGTGCGGTTA |
| *exbD* R | Iron uptake | CGCGAGACATTACCTGAGCA |
| *pirA* F | Iron uptake | GTCTATGGCTTTTGCTGCACA |
| *pirA* R | Iron uptake | GCGATTGCTTCACTTGCTCT |
| *pilT* F | Biofilm | CTTTGGTCTAGTGTGGTCATGC |
| *pilT* R | Biofilm | AAACAAAGTCGCGCAAATG |
| *piuA* F | Iron uptake | ATGGCGCAAGAAGCAGTTTC |
| *piuA* R | Iron uptake | TGTCTTTGAGAGGAGCCACG |
| *tonB3* F | Iron uptake | AAGCCAAAGCCAGTGGTTC |
| *tonB3* R | Iron uptake | CTCCACTGTACACCCGAACC |
