# Supplementary figures and images for: Characterization of Cefiderocol Heteroresistance in Carbapenem-Resistant Acinetobacter Baumannii (CRAB) Following Exposure to Human Pleural Fluid (HPF)
Source: Preprints.org preprint supplement (doi:10.20944/preprints202306.0950.v1), 2023-06-13

AMA40

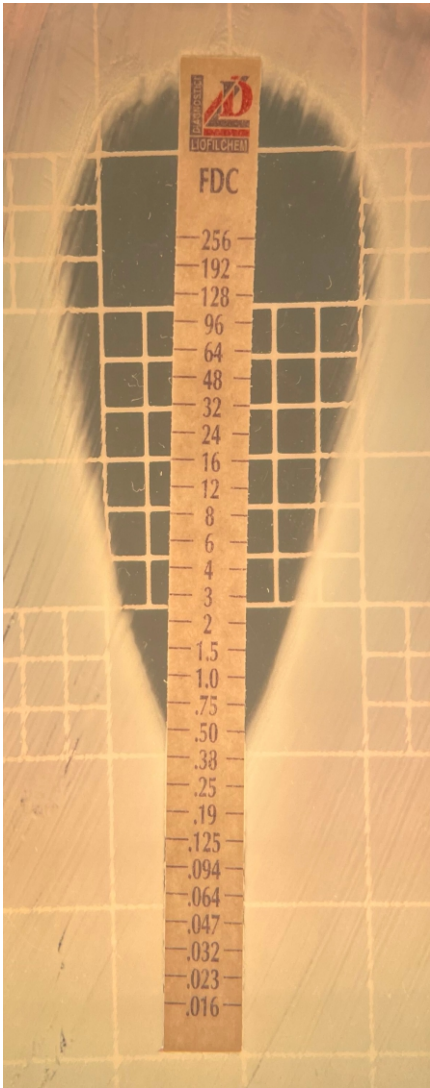

AMA40 IHC1

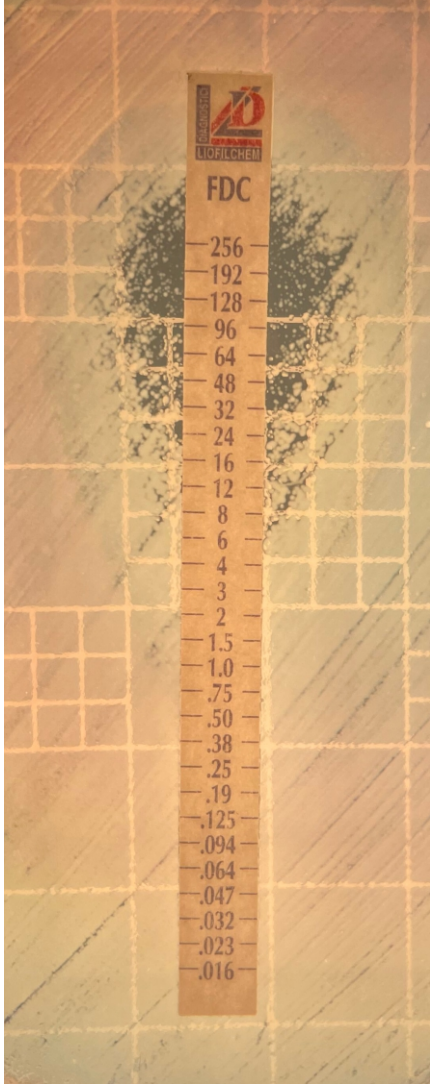

AMA40 IHC2

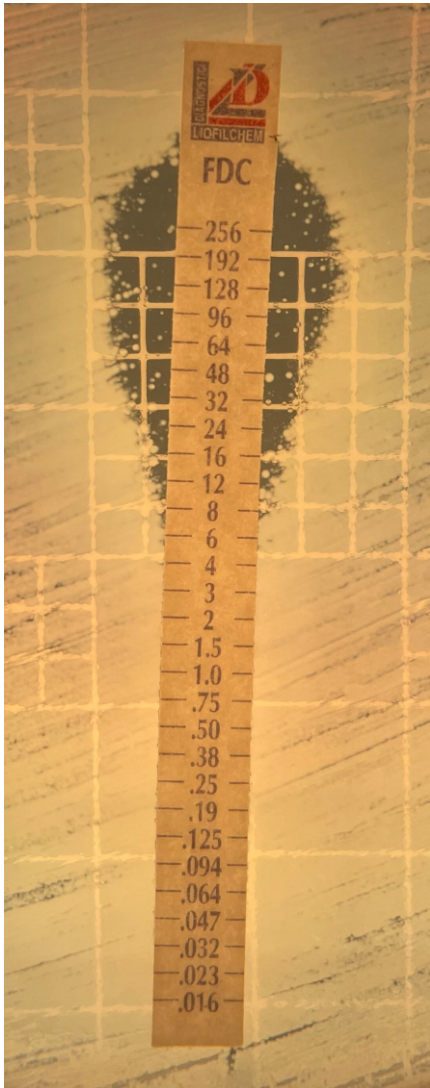

Supplement: Supplementary file 6 [file supplementary]
